# Supplementary material for: Learning Linear Functions With Real-life Tasks: An Intervention
Source: Research Square preprint supplement (doi:10.21203/rs.3.rs-7328544/v1), 2025-09-18
Supplement: Supplementary file 1 [file 0f6e2ae02abc7dec3952bd5b.docx]

**Appendices**

**Appendix A. Study process table**

|  | **Process step** |  | **Activities** |
| --- | --- | --- | --- |
| Pilot intervention | Prior to the pilot intervention | | - Co-construction of the intervention tasks and tests - Informed consent procedure |
| Pilot intervention | Control group | - Pre-intervention assessment - Post-intervention assessment |
|  | Intervention group | - Observation of a math lesson - Pre-intervention assessment - 3 in class and 2 homework intervention tasks - Post-intervention assessment |
| After the pilot intervention | | - Analysis of the effectiveness of the pilot intervention - Feedback to the teachers - Amendments to the intervention |
| The current study | Prior to the intervention | | - Informed consent procedure for the intervention - Preparing the intervention group teachers for the intervention |
| Intervention | Control group | - Pre-intervention assessment - Post-intervention assessment - Delayed post-intervention assessment |
|  | Intervention group | - Observation of practice lesson of functions - Pre-intervention assessment - 3 in class and 2 homework intervention tasks - Observation of an intervention task lesson - Post-intervention assessment - Delayed post-intervention assessment |
| After the intervention | | - Analysis of the effectiveness of the intervention - Feedback to the teachers of the intervention |

**Appendix B. An English translation of the Estonian questionnaire regarding functions which was presented to the students during all assessments**

Here are statements about learning functions. Mark how well each statement describes You. Choose an answer from the given scale, where 1 = completely disagree, 2 = somewhat disagree, 3 = do not agree or disagree, 4 = somewhat agree, 5 = completely agree.

| 1. Compared to my classmates I am doing well when it comes to solving tasks about functions. | 1 | 2 | 3 | 4 | 5 |
| --- | --- | --- | --- | --- | --- |
| 2. I understand function tasks well. | 1 | 2 | 3 | 4 | 5 |
| 3. Solving tasks about functions is difficult for me. | 1 | 2 | 3 | 4 | 5 |
| 4. I am doing well when it comes to solving tasks about functions. | 1 | 2 | 3 | 4 | 5 |
| 5. Knowing how to use functions is useful for me in other subjects. | 1 | 2 | 3 | 4 | 5 |
| 6. Knowing how to use functions is useful for me in the future. | 1 | 2 | 3 | 4 | 5 |
| 7. Knowing how to use functions is useful for me. | 1 | 2 | 3 | 4 | 5 |
| 8. Knowing how to use functions is useful for me in my everyday life. | 1 | 2 | 3 | 4 | 5 |

**Appendix C. Open-ended utility answers coding guide**

| Coding category | Examples of answers |
| --- | --- |
| Not useful | „Functions are not useful.“  „There is no need for functions when we have calculators.“ |
| Do not know | „I do not remember.“  „I do not know.“ |
| Non-specific utility | „Knowing how to use functions is useful for brain development.“  „Knowing how to use functions is useful for getting into high school.“  „Functions are useful for the future.“  „Knowing how to use functions is useful for doing well in future math.“ |
| Specific utility | „Functions are useful for construction workers/engineering.“ |
| Specific function-related utility | „Functions provide a way to show data on a graph to give a better overview of results.“  „Functions can be used to understand how things relate to one another in a linear way.“ |

**Appendix D. Example of an intervention task translated from Estonian to English**

***
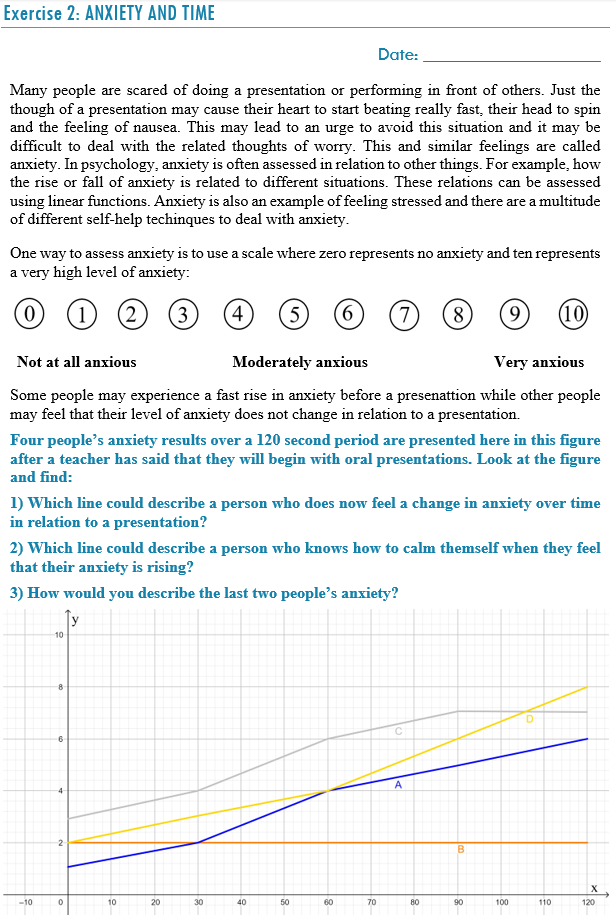
***

***
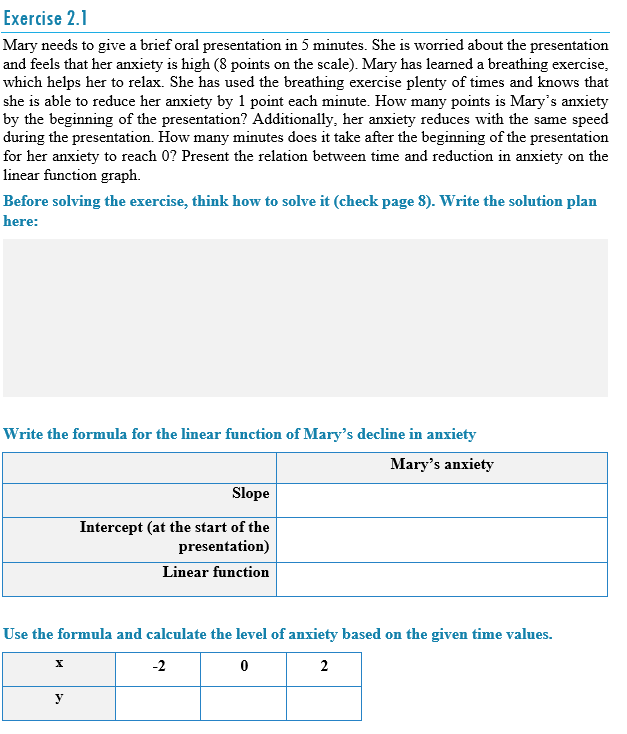
***

***
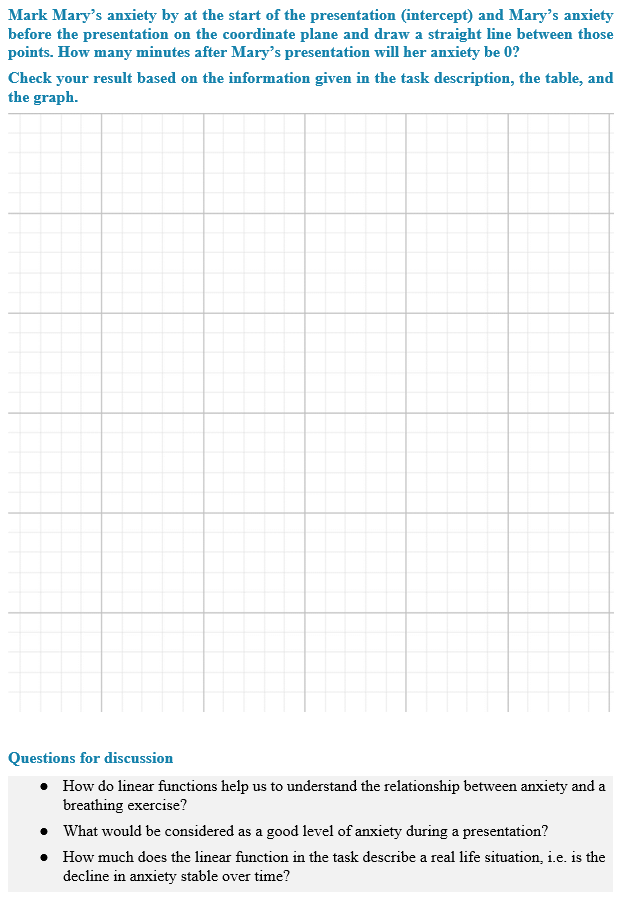
***

***
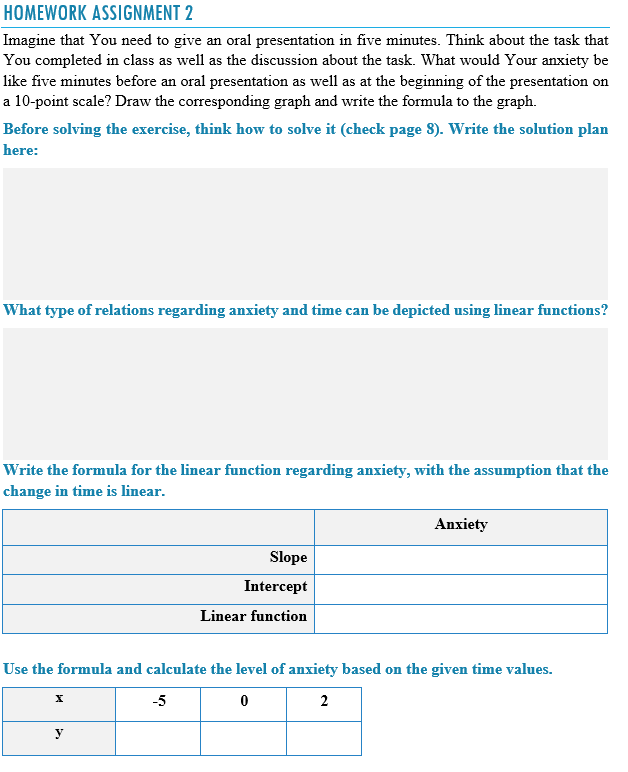
***

***
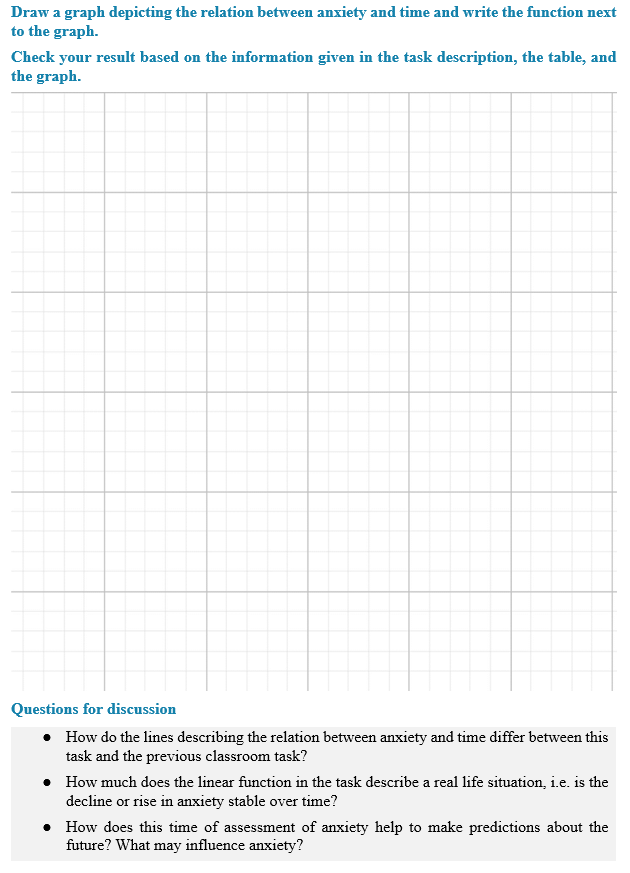
***

**Appendix E.1 Correlations between all measures of analyses**

|  |  | 1. | 2. | 3. | 4. | 5. | 6. | 7. | 8. | 9. | 10. | 11. | 12. | 13. | 14. | 15. |
| --- | --- | --- | --- | --- | --- | --- | --- | --- | --- | --- | --- | --- | --- | --- | --- | --- |
| Pre-intervention | 1. Textbook-type tasks | - | .342* | .413* | .080 | .124 | .556* | -.032 | .464* | .112 | -.013 | .625* | .079 | .260* | -.080 | -.249* |
| 2. Real-life tasks | .279* | - | .192 | .295* | .310* | .065 | .054 | .100 | .204 | .028 | .179 | .190 | .171 | .111 | .040 |
| 3. Self-efficacy Q | .507* | .217 | - | .354* | .316* | .348* | -.032 | .387* | .226* | .119 | .236 | .059 | .321* | .180 | -.055 |
| 4. Utility value Q | -.087 | -.085 | .172 | - | .350* | .224 | -.076 | .379* | .738* | .244* | .065 | -.050 | .277* | .595* | .188 |
| 5. Utility value O | .314* | .034 | .231 | .024 | - | -.019 | -.157 | .261* | .115 | .150 | .202 | .026 | .168 | .149 | .232 |
| Post-intervention | 6. Textbook-type tasks | .480* | .239 | .370* | -.167 | .204 | - | .066 | .457* | .195 | .005 | .398* | -.011 | .202 | .028 | -.093 |
| 7. Real-life tasks | -.001 | .248 | .039 | -.163 | .118 | .201 | - | .108 | -.078 | .048 | .268 | .349* | .010 | -.078 | -.100 |
| 8. Self-efficacy Q | .435* | .073 | .542* | -.071 | .298* | .507* | .340* | - | .364* | .328* | .366* | .166 | .611* | .338* | .188 |
| 9. Utility value Q | .196 | -.056 | .314* | .481* | .293* | .099 | .131 | .384* | - | .417* | .169 | .085 | .283* | .589* | .210 |
| 10. Utility value O | .246 | -.123 | .146 | .233 | .366* | -.013 | .209 | .138 | .289* | - | .162 | .033 | .394* | .254* | .611* |
| Delayed post-inter. | 11. Textbook-type tasks | .455* | .193 | .327* | -.081 | .226 | .676* | .312* | .494* | .126 | .306* | - | .185 | .297* | -.203 | -.169 |
| 12. Real-life tasks | .168 | .153 | .283 | -.187 | .133 | .463* | .499* | .426* | -.095 | .006 | .443* | - | .059 | .008 | -.128 |
| 13. Self-efficacy Q | .481* | .094 | .512* | -.177 | .304* | .574* | .145 | .738* | .194 | .130 | .617* | .368* | - | .445* | .283* |
| 14. Utility value Q | .228 | .235 | .166 | .468* | .275* | .203 | .061 | .052 | .470* | .315* | .044 | -.157 | .163 | - | .411* |
| 15. Utility value O | .474* | -.058 | .254 | .149 | .093 | .287 | .147 | .181 | .144 | .313* | .264 | .272 | .178 | .080 | - |

*Note. Results below the diagonal are for the intervention group, above the diagonal for the control group. Q – questionnaire, O – open-ended, * - p < .05.*

**Appendix F.1 Post-intervention first real-life task Configural Frequency Analysis**

| Group | Slope | Intercept | Formula | Graph | Task answer | Observed counts | Expected counts |
| --- | --- | --- | --- | --- | --- | --- | --- |
| Control | 0 | 0 | 0 | 0 | 0 | 4 | 0.04 |
| Control | 0 | 0 | 0 | 1 | 0 | 1 | 0.05 |
| Control | 0 | 1 | 0 | 0 | 0 | 4 | 0.37 |
| Intervention | 0 | 1 | 0 | 0 | 0 | 8 | 1.07 |
| Intervention | 1 | 1 | 1 | 1 | 1 | 21 | 5.7 |

*Note. p < .05 for all results in the table.*

**Appendix F.2 Post-intervention second real-life task Configural Frequency Analysis**

| Group | Slope | Intercept | Formula | Graph | Task answer | Observed counts | Expected counts |
| --- | --- | --- | --- | --- | --- | --- | --- |
| Control | 0 | 0 | 0 | 0 | 0 | 3 | 0.004 |
| Control | 0 | 0 | 0 | 1 | 1 | 1 | 0.02 |
| Control | 1 | 1 | 1 | 0 | 0 | 6 | 1.60 |
| Intervention | 0 | 0 | 0 | 0 | 0 | 2 | 0.01 |
| Intervention | 0 | 1 | 0 | 0 | 0 | 2 | 0.08 |
| Intervention | 1 | 1 | 1 | 1 | 1 | 35 | 15.46 |

*Note. p < .05 for all results in the table.*

**Appendix F.3 Delayed post-intervention first real-life task Configural Frequency Analysis**

| Group | Slope | Intercept | Formula | Graph | Task answer | Observed | Expected |
| --- | --- | --- | --- | --- | --- | --- | --- |
| Control | 0 | 1 | 0 | 0 | 0 | 6 | 0.66 |
| Control | 0 | 0 | 0 | 0 | 1 | 1 | 0.04 |
| Control | 0 | 1 | 0 | 0 | 1 | 5 | 0.90 |
| Intervention | 1 | 1 | 1 | 1 | 1 | 12 | 2.79 |

*Note. p < .05 for all results in the table.*

**Appendix F.4 Delayed post-intervention second real-life task Configural Frequency Analysis**

| Group | Slope | Intercept | Formula | Graph | Task answer | Observed counts | Expected counts |
| --- | --- | --- | --- | --- | --- | --- | --- |
| Control | 0 | 0 | 0 | 0 | 0 | 2 | 0.03 |
| Control | 1 | 0 | 0 | 0 | 0 | 2 | 0.11 |
| Control | 0 | 0 | 0 | 0 | 1 | 1 | 0.03 |
| Control | 0 | 1 | 1 | 0 | 0 | 3 | 0.56 |
| Control | 1 | 1 | 1 | 0 | 0 | 8 | 2.33 |
| Intervention | 0 | 0 | 0 | 0 | 0 | 1 | 0.05 |
| Intervention | 1 | 0 | 0 | 0 | 0 | 2 | 0.21 |
| Intervention | 0 | 0 | 0 | 0 | 1 | 1 | 0.06 |
| Intervention | 1 | 1 | 1 | 1 | 1 | 23 | 5.75 |

*Note. p < .05 for all results in the table.*
